# Supplementary material
Source: HighWire-hosted journal article supplement (doi:10.1101/gr-5413r)
Supplement: Borevitz_supp.pdf [file Borevitz_supp.pdf]

## Supplementary Tables for

Large Scale Identification of Single Feature Polymorphisms in Complex Genomes.  
Justin O. Borevitz, David Liang, David Plouffe, Hur-Song Chang, Tong Zhu, Detlef Weigel, Charles C. Berry, Elizabeth Winzeler, Joanne Chory

**Supplement Table 1**

| General                                          |          | number of features |
|--------------------------------------------------|----------|--------------------|
| Total PM, MM, and controls                       | 534X534= | 285156             |
| PM excluding controls                            | 100%     | 131822             |
| Unique match                                     | 83%      | 109825             |
| High - stringency unique match                   | 79%      | 103860             |
| <b>Overlapping features (22,23,24, or 25 bp)</b> |          |                    |
| No overlap > 22 bp                               | 61%      | 80986              |
| Two features overlap                             | 7%       | 8606               |
| Three features overlap                           | 1%       | 1835               |
| Four features overlap                            | 1%       | 1313               |
| Five features overlap                            | 0%       | 12                 |
| Six features overlap                             | 0%       | 3                  |
| Unique positions                                 | 70%      | 92924              |
| <b>Chromosome</b>                                |          |                    |
| 1                                                | 15%      | 20317              |
| 2                                                | 25%      | 33241              |
| 3                                                | 5%       | 5984               |
| 4                                                | 21%      | 27172              |
| 5                                                | 5%       | 6210               |
| <b>Genes</b>                                     |          | number of genes    |
| 5 or more features                               |          | 6859               |

Supplement Table 1. Description of features on the AtGenome1 array. Each 25 bp PM feature was aligned to the five *Arabidopsis thaliana* pseudo-chromosomes (1/7/02 release) using BLAST. Repetitive features and those that were not perfect matches were removed. We further increased the stringency by lowering the BLAST threshold so that features aligning imperfectly to multiple positions were also removed (see Methods). The exact chromosome location of each feature in this unique set was recorded. Since features were sometimes designed to cover only a small portion of a gene, they often overlapped. When features overlapped by 22, 23, 24 or 25 bp, we grouped them together so that just one test was performed on the group. Many groups consisted of 2 features, but some contained as many as 6. PM, perfect match; MM, mismatch

Supplement Figure 1

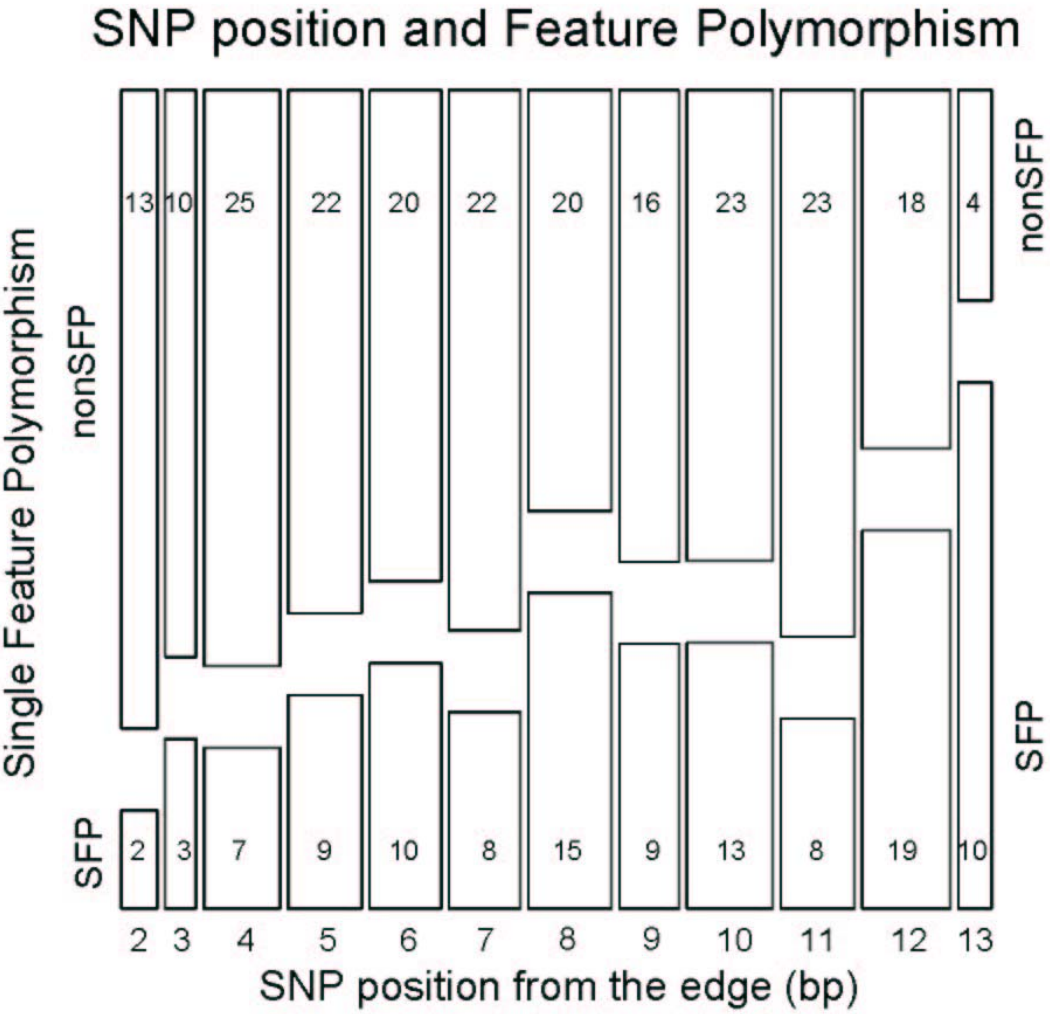

## **Supplement Figure 1 Description**

We aligned the 340 Cereon candidate polymorphisms with the corresponding 25bp feature sequence, to determine the relationship between the SNP position and the ability of that feature to detect a polymorphism. ClustalW was used followed by manual sequence alignment. 11 features contained polymorphisms at more than 1 location and are not included in this analysis. Polymorphisms are considered symmetrical, and were scored as the distance from the nearest edge of the 25bp feature. Thus position 2 and 24 or 3 and 23, etc., are equivalent. Supplement Figure 1 shows the proportion of SFPs detected at different SNP positions. When a polymorphism is at the central base (position 13), it is more often detected as a Single Feature Polymorphism. Furthermore when a polymorphism is near the edge of the 25bp feature (position 2 or 3) it is less often identified as a SFP. Polymorphisms at intermediate distances have a similar chance of being identified. The trend between SNP position and SFP detection is significant (Chi-squared Test for Trend in Proportions, p-value = 0.0004), however other factors besides position may also be important. In addition some Cereon candidate polymorphisms may be sequencing errors. These would not show a relationship with SNP position and would therefore weaken the apparent association of SFP detection with central location in the 25 bp region.

**Supplement Table 2 (part1)**

| PM only                                     |     |          |         | PM - MM                                     |                 |          |         |
|---------------------------------------------|-----|----------|---------|---------------------------------------------|-----------------|----------|---------|
| SAM threshold                               |     |          |         | SAM threshold                               |                 |          |         |
| 5% FDR                                      |     |          |         | 5% FDR                                      |                 |          |         |
|                                             |     | GeneChip |         |                                             |                 | GeneChip |         |
|                                             |     | SFPs     | nonSFPs |                                             |                 | SFPs     | nonSFPs |
|                                             |     | 3806     | 89118   |                                             |                 | 3806     | 89118   |
| Sequence                                    | 817 | 121      | 696     | Sensitivity                                 | 817             | 105      | 712     |
| Polymorphic                                 | 340 | 117      | 223     | 34%                                         | Polymorphic     | 340      | 96      |
| Non-polymorphic                             | 477 | 4        | 473     |                                             | Non-polymorphic | 477      | 9       |
| False Discovery rate:                       |     | 3%       |         | False Discovery rate:                       |                 | 9%       |         |
| Test for independence of all factors:       |     |          |         | Test for independence of all factors:       |                 |          |         |
| Chisq = 177.34, df = 1, p-value = 1.845e-40 |     |          |         | Chisq = 123.04, df = 1, p-value = 1.364e-28 |                 |          |         |

|                                             |     |          |         |                                             |                 |          |         |
|---------------------------------------------|-----|----------|---------|---------------------------------------------|-----------------|----------|---------|
| SAM threshold                               |     |          |         | SAM threshold                               |                 |          |         |
| 18% FDR                                     |     |          |         | 18% FDR                                     |                 |          |         |
|                                             |     | GeneChip |         |                                             |                 | GeneChip |         |
|                                             |     | SFPs     | nonSFPs |                                             |                 | SFPs     | nonSFPs |
|                                             |     | 10627    | 82297   |                                             |                 | 10627    | 82297   |
| Sequence                                    | 817 | 223      | 594     | Sensitivity                                 | 817             | 178      | 639     |
| Polymorphic                                 | 340 | 195      | 145     | 57%                                         | Polymorphic     | 340      | 142     |
| Non-polymorphic                             | 477 | 28       | 449     |                                             | Non-polymorphic | 477      | 36      |
| False Discovery rate:                       |     | 13%      |         | False Discovery rate:                       |                 | 20%      |         |
| Test for independence of all factors:       |     |          |         | Test for independence of all factors:       |                 |          |         |
| Chisq = 265.13, df = 1, p-value = 1.309e-59 |     |          |         | Chisq = 136.39, df = 1, p-value = 1.636e-31 |                 |          |         |

**Supplement Table 2 (part2)**

| MM only                                    |              |     |     | PM and MM                                   |              |     |     |
|--------------------------------------------|--------------|-----|-----|---------------------------------------------|--------------|-----|-----|
| SAM threshold<br>5% FDR                    |              |     |     | SAM threshold<br>5% FDR                     |              |     |     |
|                                            | GeneChip     |     |     |                                             | GeneChip     |     |     |
|                                            | SFPs nonSFPs |     |     |                                             | SFPs nonSFPs |     |     |
|                                            | 3806 89118   |     |     |                                             | 3806 89118   |     |     |
| Sequence                                   | 817          | 64  | 753 | Sensitivity                                 | 817          | 109 | 708 |
| Polymorphic                                | 340          | 57  | 283 | 17%                                         | 340          | 104 | 236 |
| Non-polymorphic                            | 477          | 7   | 470 |                                             | 477          | 5   | 472 |
| False Discovery rate: 11%                  |              |     |     | False Discovery rate: 5%                    |              |     |     |
| Test for independence of all factors:      |              |     |     | Test for independence of all factors:       |              |     |     |
| Chisq = 64.34, df = 1, p-value = 1.048e-15 |              |     |     | Chisq = 149.82, df = 1, p-value = 1.894e-34 |              |     |     |
| SAM threshold<br>18% FDR                   |              |     |     | SAM threshold<br>18% FDR                    |              |     |     |
|                                            | GeneChip     |     |     |                                             | GeneChip     |     |     |
|                                            | SFPs nonSFPs |     |     |                                             | SFPs nonSFPs |     |     |
|                                            | 10627 82297  |     |     |                                             | 10627 82297  |     |     |
| Sequence                                   | 817          | 145 | 672 | Sensitivity                                 | 817          | 199 | 618 |
| Polymorphic                                | 340          | 100 | 240 | 29%                                         | 340          | 168 | 172 |
| Non-polymorphic                            | 477          | 45  | 432 |                                             | 477          | 31  | 446 |
| False Discovery rate: 31%                  |              |     |     | False Discovery rate: 16%                   |              |     |     |
| Test for independence of all factors:      |              |     |     | Test for independence of all factors:       |              |     |     |
| Chisq = 54.27, df = 1, p-value = 1.746e-13 |              |     |     | Chisq = 198.4, df = 1, p-value = 4.656e-45  |              |     |     |

Supplement Table 2. Perfect match and mismatch model comparisons. False Discovery Rates and Sensitivities are shown for PM only, PM-MM, MM only, and PM and MM models. Mismatch signal is subtracted from the perfect match signal in the PM-MM model. The mismatch feature is used as a second observation in the PM and MM model (see below). Chi square test statistic (Chisq).

## Supplement Table 2 Description

The mismatch (MM) feature on GeneChips was designed as a control for background hybridization (Lipshutz et al. 1999; Lockhart et al. 1996). Under this assumption, the intensity from the MM feature should be subtracted from the perfect match (PM) feature to reveal the true signal of a 25 bp oligonucleotide. We tested three models using the MM feature, none of which performed better than PM alone. Difference values (PM - MM) were used to compute false discovery and sensitivity rates by comparison with sequence data. For a direct comparison with PM only scores we choose thresholds where 3806 or 10627 SFPs could be identified. After log transformation and spatial correction the MM signal was subtracted from the PM signal. Spatial correction also slightly improved the PM-MM results. The PM-MM difference values were effective at predicting markers however not as effective as PM alone (part1). PM and MM hybridization intensities are highly correlated ( $r=0.8$ ). We further searched the *Arabidopsis* genome using all 25 bp MM sequences and found that a MM feature aligned uniquely to the same place as the corresponding PM feature 98.8% of the time, indicating that the MM signal was indeed quite specific and that it may not be a good control for background hybridization. Furthermore SFP analysis using MM data only was also effective at discovering markers, albeit with lower accuracy. The specificity of the MM feature suggested its use as a second observation of the PM feature. When a feature is a bona fide marker, both the PM and MM features may have a significantly lower intensity. PM together with MM data was quite effective at predicting markers, but including the MM as a second observation again was not an improvement over PM alone. Therefore we see no practical use of the MM feature in our studies.

**Supplement Table 3**

| Mean t-statistic | Original data | Permuted data | Difference | FDR       |
|------------------|---------------|---------------|------------|-----------|
| 0.2              | 165           | 120           | 45         | 73%       |
| 0.4              | 147           | 64            | 83         | 43%       |
| 0.6              | 137           | 23            | 114        | 17%       |
| 0.8              | 123           | 11            | 112        | 9%        |
| <b>1.0</b>       | <b>105</b>    | <b>5</b>      | <b>100</b> | <b>5%</b> |
| 1.2              | 82            | 3             | 79         | 4%        |

Supplement Table 3. Potential deletions in 2000 clusters. A threshold was set for potential deletions by calculating the number of potential deletions in the real data and comparing it to the average number in the permuted data. The difference between the original data and permuted data and the false discovery rates were also determined. Mean t-statistic is the average of all the t-statistics in the cluster.

**Supplement Table 4.** Potentially deleted genes. 105 deletions were detected that cover 111 genes. The probe set(s), chromosome, location, size, number of features covered, and gene (At and BAC name) and description are shown. Deletions shown in grey were confirmed by Cereon shotgun Ler sequence.

| Deletion number | Affy probe set1 | Affy probe set2 | chrom | chrom position start | width | number features | Annotation 1.7.02                                                                                                                                                                                                                                                                   |
|-----------------|-----------------|-----------------|-------|----------------------|-------|-----------------|-------------------------------------------------------------------------------------------------------------------------------------------------------------------------------------------------------------------------------------------------------------------------------------|
| 1               | 18310_at        |                 | CHR1  | 4057090              | 415   | 5               | At1g12010 F12F1.12 putative amino-cyclopropane-carboxylic acid oxidase (ACC oxidase) Strong similarity to amino-cyclopropane-carboxylic acid oxidase gb L27664 from Brassica napus. ESTs gb Z48548 and gb Z48549 come from this gene; supported by cDNA: gi_15450652_gb_AY052694.1_ |
| 2               | 16182_at        |                 | CHR1  | 8363359              | 2121  | 15              | At1g23610 F28C11.24 F508.17 putative OBP32pep protein                                                                                                                                                                                                                               |
|                 | 13375_at        |                 | CHR1  |                      |       |                 | At1g23620 F28C11.21 F508.18 pseudogene, hypothetical protein                                                                                                                                                                                                                        |
| 3               | 19026_at        |                 | CHR1  | 9480330              | 251   | 7               | At1g27285 F17L21.7 putative polyprotein similar to GB:AAC02666                                                                                                                                                                                                                      |
| 4               | 18161_at        |                 | CHR1  | 11064863             | 238   | 8               | At1g31030 F17F8.5 putative reverse transcriptase similar to a multitude of putative reverse transcriptase sequences                                                                                                                                                                 |
| 5               | 19691_at        |                 | CHR1  | 11087815             | 351   | 4               | At1g31070 F17F8.1 UDP-N-acetylglucosamine pyrophosphorylase-like protein similar to sperm associated antigen 2, GB:4507759 from [Homo sapiens], similar to ESTs gb N95844, gb AI162709, gb N65104, dbj AU031622, and gb T45941                                                      |



|    |            |          |      |          |      |                                                                                                                                                                                                                               |
|----|------------|----------|------|----------|------|-------------------------------------------------------------------------------------------------------------------------------------------------------------------------------------------------------------------------------|
|    |            |          |      |          |      | Atlg31580 F27M3.20 F27M3.20 ORF1,<br>putative similar to ORF1 GI:457716<br>from (Arabidopsis thaliana);<br>supported by cDNA:                                                                                                 |
| 6  | 16439_at   |          | CHR1 | 11311477 | 269  | 10 gi_16649160_gb_AY059950.1_<br><br>Atlg34200 F23M19.12 F12G12.25 unknown<br>protein ; supported by cDNA:                                                                                                                    |
| 7  | 20025_at   |          | CHR1 | 12457181 | 171  | 8 gi_13605868_gb_AF367333.1_AF367333<br>Atlg44970 F27F5.6 peroxidase,<br>putative similar to peroxidase<br>GI:993004 from [Mercurialis<br>annua];supported by full-length cDNA:                                               |
| 8  | 12386_at   |          | CHR1 | 16532954 | 135  | 7 Ceres:26375.<br>Atlg52100 F5F19.16 jasmonate<br>inducible protein, putative similar<br>to jasmonate inducible protein<br>GI:9279645 from [Arabidopsis<br>thaliana]; contains non-consensus AG<br>donor splice site at exon3 |
| 9  | 18927_at   |          | CHR1 | 18970876 | 732  | 13 Atlg53950 T18A20.25 F15I1.3<br>ubiquitin, putative similar to<br>ubiquitin GI:159038 from [Euplotes<br>eurytostomus]                                                                                                       |
| 10 | 16834_at   | 15944_at | CHR1 | 19734201 | 1043 | 13 Atlg55430 T5A14.18 hypothetical<br>protein similar to putative CHP-rich<br>zinc finger protein GB:CAB80684<br>GI:7268575 from [Arabidopsis<br>thaliana]                                                                    |
| 11 | 16384_at   |          | CHR1 | 20285376 | 359  | 7 Atlg56650 F25P12.92 anthocyanin2,<br>putative similar to anthocyanin2<br>(An2) GI:7673088 from [Petunia<br>integrifolia]; supported by cDNA:                                                                                |
| 12 | 16073_f_at |          | CHR1 | 20821348 | 231  | 6 gi_3941507_gb_AF062908.1_AF062908                                                                                                                                                                                           |

|    |          |      |          |      |    |                                                                                                                                                                                          |
|----|----------|------|----------|------|----|------------------------------------------------------------------------------------------------------------------------------------------------------------------------------------------|
| 13 | 18166_at | CHR1 | 20905035 | 276  | 8  | Atlg57560 T8L23.3 DNA-binding protein, putative similar to DNA-binding protein GI:19058 from [Hordeum vulgare]; supported by full-length cDNA: Ceres:250386.                             |
| 14 | 17787_at | CHR1 | 21753373 | 173  | 5  | Atlg60020 T2K10.7 polyprotein, putative similar to polyprotein GI:2865437 from [Arabidopsis arenosa]                                                                                     |
| 15 | 18163_at | CHR1 | 21883140 | 437  | 7  | Atlg60310 T13D8.19 pseudogene, putative non-LTR retroelement reverse transcriptase                                                                                                       |
| 16 | 19796_at | CHR1 | 21907131 | 254  | 4  | Atlg60400 T13D8.27 hypothetical protein similar to heat shock transcription factor HSF30-like protein GI:9759202 from [Arabidopsis thaliana]                                             |
| 17 | 15032_at | CHR1 | 22239091 | 1093 | 6  | Atlg61250 F11P17.4 secretory carrier membrane protein identical to secretory carrier membrane protein GI:7109228 from [Arabidopsis thaliana];supported by full-length cDNA: Ceres:27197. |
| 18 | 12363_at | CHR1 | 22602677 | 283  | 7  | Atlg62090 F19K23.4 hypothetical protein similar to putative receptor-like protein kinase GI:3461841 from [Arabidopsis thaliana]                                                          |
| 19 | 13840_at | CHR1 | 24813600 | 2192 | 15 | Atlg67240 F1N21.6 mutator-like transposase, putative similar to mutator-like transposase GI:5306250 from [Arabidopsis thaliana]                                                          |
|    | 19198_at | CHR1 |          |      |    | Atlg67250 F1N21.7 unknown protein ;supported by full-length cDNA: Ceres:27632.                                                                                                           |

|    |            |      |          |      |    |                                                                                                                                                                   |
|----|------------|------|----------|------|----|-------------------------------------------------------------------------------------------------------------------------------------------------------------------|
|    |            |      |          |      |    | At1g76960 F22K20.6 unknown protein ; supported by cDNA:                                                                                                           |
| 20 | 14096_at   | CHR1 | 28573805 | 194  | 5  | gi_13926184_gb_AF370567.1_AF370567                                                                                                                                |
| 21 | 12194_at   | CHR2 | 151414   | 168  | 7  | At2g01310 F10A8.19 unknown protein                                                                                                                                |
| 22 | 19048_at   | CHR2 | 337068   | 266  | 5  | At2g01780 T8O11.5 putative S-locus glycoprotein                                                                                                                   |
| 23 | 12640_s_at | CHR2 | 497977   | 161  | 5  | At2g02060 F14H20.13 F5O4.17 unknown protein                                                                                                                       |
| 24 | 16722_at   | CHR2 | 1079050  | 679  | 12 | At2g03560 F19B11.1 F-box protein family, AtFBX7 contains F-box domain PF:00646                                                                                    |
| 25 | 15916_at   | CHR2 | 1525190  | 139  | 4  | At2g04380 T1O3.21 unknown protein                                                                                                                                 |
| 26 | 14125_at   | CHR2 | 2900217  | 184  | 6  | At2g06990 T4E14.10 unknown protein ; supported by cDNA: gi_16024935_gb_AY050658.1_                                                                                |
| 27 | 14792_at   | CHR2 | 4365859  | 128  | 4  | At2g11140 T13H18.4 putative retroelement pol polyprotein                                                                                                          |
| 28 | 16714_at   | CHR2 | 4366037  | 2729 | 9  | At2g11150 T13H18.5 putative replication protein A1                                                                                                                |
| 29 | 20304_at   | CHR2 | 4426468  | 5527 | 19 | At2g11240 T13H18.14 putative non-LTR retroelement reverse transcriptase                                                                                           |
|    | 20672_at   | CHR2 |          |      |    | At2g11260 T13H18.16 unknown protein                                                                                                                               |
| 30 | 20182_at   | CHR2 | 5636422  | 105  | 4  | At2g13650 T10F5.19 putative vanadate resistance protein                                                                                                           |
| 31 | 20192_s_at | CHR2 | 5641067  | 230  | 6  | At2g13660 T10F5.25 F13J11.1 unknown protein                                                                                                                       |
| 32 | 14927_at   | CHR2 | 5673036  | 407  | 7  | At2g13720 F13J11.7 unknown protein<br>At2g13940 F9B22.5 putative retroelement pol polyprotein contains a Zn-finger CCHC type domain (prosite:QDOC50158) and a DDE |
| 33 | 17763_at   | CHR2 | 5805349  | 102  | 4  | integrase signature motif                                                                                                                                         |

|    |                     |      |         |      |    |                                                                                                                                                         |
|----|---------------------|------|---------|------|----|---------------------------------------------------------------------------------------------------------------------------------------------------------|
| 34 | 16272_at            | CHR2 | 6006070 | 290  | 9  | At2g14290 T1016.12 hypothetical protein predicted by genscan and genefinder                                                                             |
| 35 | 19239_at            | CHR2 | 6371867 | 187  | 6  | At2g14930 T26I20.9 putative retroelement pol polyprotein                                                                                                |
| 36 | 19264_at            | CHR2 | 6671461 | 496  | 16 | At2g15410 F26H6.7 putative retroelement pol polyprotein                                                                                                 |
| 37 | 17829_at            | CHR2 | 6727680 | 246  | 6  | At2g15540 F90I3.9 putative non-LTR retroelement reverse transcriptase                                                                                   |
| 38 | 19813_at            | CHR2 | 6939935 | 440  | 13 | At2g16110 F7H1.13 putative non-LTR retroelement reverse transcriptase                                                                                   |
| 39 | 15233_at            | CHR2 | 7009545 | 1096 | 7  | At2g16300 F16F14.20 hypothetical protein predicted by genscan                                                                                           |
| 40 | 13190_s_at 17486_at | CHR2 | 7513871 | 575  | 10 | At2g17420 F5J6.18 putative thioredoxin reductase                                                                                                        |
| 41 | 20394_at            | CHR2 | 7599860 | 218  | 7  | At2g17590 MJB20.15 unknown protein                                                                                                                      |
| 42 | 20318_at            | CHR2 | 7600101 | 207  | 7  | At2g17600 MJB20.16 unknown protein                                                                                                                      |
| 43 | 19777_s_at          | CHR2 | 7603398 | 3424 | 17 | At2g17610 T19E12.5 putative non-LTR retroelement reverse transcriptase                                                                                  |
| 44 | 17327_at            | CHR2 | 7730596 | 315  | 7  | At2g17910 T13L16.7 putative non-LTR retroelement reverse transcriptase                                                                                  |
| 45 | 16144_s_at          | CHR2 | 7856383 | 105  | 5  | At2g18170 F8D23.5 MAP kinase (ATMPK7) identical to GB:Q39027; MAP-mitogen activated protein kinase; supported by cDNA: gi_457405_dbj_D21843.1_ATHATMPK7 |
| 46 | 13888_s_at          | CHR2 | 8293352 | 256  | 10 | At2g19230 F27F23.3 putative receptor-like protein kinase                                                                                                |
| 47 | 16777_at            | CHR2 | 8924757 | 327  | 6  | At2g20850 F5H14.18 putative LRR receptor protein kinase ; supported by cDNA: gi_15810274_gb_AY056176.1_                                                 |

|    |            |      |          |      |    |                                                                                                                      |
|----|------------|------|----------|------|----|----------------------------------------------------------------------------------------------------------------------|
|    |            |      |          |      |    | At2g21270 F3K23.3 putative ubiquitin fusion-degradation protein<br>;supported by full-length cDNA:<br>Ceres:34470.   |
| 48 | 19865_g_at | CHR2 | 9056723  | 113  | 8  |                                                                                                                      |
| 49 | 20104_at   | CHR2 | 9282818  | 1737 | 6  | At2g21900 F7D8.22 putative WRKY-type DNA binding protein                                                             |
| 50 | 20483_at   | CHR2 | 9980905  | 134  | 5  | At2g23570 F26B6.22 putative acetone-cyanohydrin lyase                                                                |
|    |            |      |          |      |    | At2g24150 F27D4.6 hypothetical protein predicted by genefinder;<br>supported by cDNA:                                |
| 51 | 18416_at   | CHR2 | 10214336 | 350  | 8  | gi_13877832_gb_AF370179.1_AF370179                                                                                   |
| 52 | 20426_at   | CHR2 | 10442884 | 163  | 5  | At2g24680 F25P17.2 unknown protein                                                                                   |
| 53 | 13331_at   | CHR2 | 11040466 | 200  | 5  | At2g26030 T19L18.16 hypothetical protein predicted by genscan                                                        |
| 54 | 17693_at   | CHR2 | 11389579 | 1023 | 13 | At2g26820 F12C20.14 similar to avrRpt2-induced protein 1                                                             |
| 55 | 15286_s_at | CHR2 | 11815859 | 483  | 4  | At2g27870 T1E2.21 F15K20.3 putative reverse transcriptase                                                            |
| 56 | 18144_at   | CHR2 | 13171713 | 328  | 8  | At2g31080 T16B12.11 putative non-LTR retroelement reverse transcriptase                                              |
|    |            |      |          |      |    | At2g33220 F25I18.4 unknown protein predicted by genefinder and 5' EST;<br>supported by full-length cDNA: Ceres: 954. |
| 57 | 20001_at   | CHR2 | 14027694 | 513  | 4  |                                                                                                                      |
| 58 | 17458_at   | CHR2 | 15542346 | 450  | 9  | At2g37110 T2N18.13 unknown protein<br>;supported by full-length cDNA:<br>Ceres:123128.                               |
|    | 19972_at   | CHR2 |          |      |    | At2g37120 T2N18.12 unknown protein<br>; supported by full-length cDNA:<br>Ceres: 1517.                               |
| 59 | 17760_at   | CHR2 | 18599894 | 160  | 8  | At2g45230 F4L23.26 putative non-LTR retroelement reverse transcriptase                                               |

|    |          |            |          |         |      |                                                                                                                                 |                                                                                                                   |
|----|----------|------------|----------|---------|------|---------------------------------------------------------------------------------------------------------------------------------|-------------------------------------------------------------------------------------------------------------------|
| 60 | 17334_at | CHR3       | 9011584  | 4213    | 21   | At3g24675 MSD24.5 pseudogene, reverse transcriptase similar to reverse transcriptase GB:S65812 from [Arabidopsis thaliana]      |                                                                                                                   |
|    | 18364_at | CHR3       |          |         |      | At3g24680 MSD24.2 zinc-finger protein, putative almost identical to zinc-finger protein GB:S65811 from [Arabidopsis thaliana]   |                                                                                                                   |
| 61 | 12237_at | CHR3       | 18896817 | 1428    | 7    | At3g50810 F18B3.90 putative protein                                                                                             |                                                                                                                   |
| 62 | 17833_at | CHR4       | 823853   | 411     | 6    | At4g01910 T7B11.17 putative CHP-rich zinc finger protein similar to several A. thaliana CHP-rich proteins                       |                                                                                                                   |
| 63 | 16829_at | CHR4       | 828481   | 183     | 7    | At4g01920 T7B11.18 putative CHP-rich zinc finger protein similar to A. thaliana CHP-rich proteins                               |                                                                                                                   |
| 64 | 14573_at | CHR4       | 1040562  | 985     | 5    | At4g02360 T14P8.17 putative protein                                                                                             |                                                                                                                   |
|    | 13648_at | CHR4       |          |         |      | At4g02370 T14P8.18 coded for by A. thaliana cDNA R64991 ;supported by full-length cDNA: Ceres:19543.                            |                                                                                                                   |
| 65 | 18762_at | 18763_g_at | CHR4     | 1096573 | 1196 | 4                                                                                                                               | At4g02490 T10P11.21 T14P8.10 hypothetical protein similar to reverse transcriptases (Pfam: rvt.hmm, score: 53.76) |
| 66 | 16240_at | CHR4       | 1467128  | 169     | 6    | At4g03340 F4C21.27 putative glycosylation enzyme similar to B. taurus core2-GLCNAC-transferase, GenBank accession number U41320 |                                                                                                                   |
| 67 | 19104_at | CHR4       | 1541677  | 181     | 4    | At4g03470 F9H3.10 putative protein                                                                                              |                                                                                                                   |
| 68 | 19072_at | CHR4       | 1541897  | 6789    | 23   | At4g03480 F9H3.11 hypothetical protein similar to A. thaliana hypothetical protein F21B7.8, GenBank accession number AC002560   |                                                                                                                   |

|    |            |      |         |      |    |                                                                                                                                                                 |
|----|------------|------|---------|------|----|-----------------------------------------------------------------------------------------------------------------------------------------------------------------|
| 69 | 15239_at   | CHR4 | 1548706 | 576  | 5  | At4g03490 F9H3.12 hypothetical protein similar to A. thaliana hypothetical protein F21B7.8, GenBank accession number AC002560                                   |
| 70 | 19324_at   | CHR4 | 1555288 | 1573 | 9  | At4g03500 F9H3.13 hypothetical protein                                                                                                                          |
|    | 17552_s_at | CHR4 |         |      |    | At4g03510 F9H3.14 RMA1 RING zinc finger protein identical to RMA1 gi:3164222; supported by cDNA: gi_3164221_dbj_AB008518.1_AB008518                             |
| 71 | 14272_at   | CHR4 | 1742879 | 393  | 5  | At4g03800 T5H22.5 hypothetical protein                                                                                                                          |
| 72 | 17635_at   | CHR4 | 1851621 | 160  | 4  | At3g31440 T22C2.4 pseudogene, putative helicase                                                                                                                 |
| 73 | 17834_at   | CHR4 | 1923067 | 678  | 8  | At4g04000 T24H24.17 putative reverse transcriptase                                                                                                              |
| 74 | 13871_at   | CHR4 | 2145670 | 139  | 7  | At4g04390 T19B17.11 hypothetical protein                                                                                                                        |
| 75 |            |      | 2146011 | 151  | 6  |                                                                                                                                                                 |
| 76 | 17371_at   | CHR4 | 2239307 | 264  | 4  | At4g04500 T26N6.11 putative receptor-like protein kinase                                                                                                        |
| 77 | 17813_at   | CHR4 | 3558830 | 195  | 7  | At4g07770 F5K24.12 pseudogene                                                                                                                                   |
| 78 | 19350_at   | CHR4 | 5089939 | 6953 | 20 | At4g09690 F17A8.40 T25P22.5 putative protein hypothetical protein T15B16.6 - Arabidopsis thaliana,PIR2:T01999                                                   |
|    | 17333_at   | CHR4 |         |      |    | At4g09710 F17A8.60 RNA-directed DNA polymerase -like protein RNA-directed DNA polymerase (EC 2.7.7.49)- Arabidopsis thaliana retrotransposon Ta11-1,PIR2:S65812 |

|    |          |      |         |     |    |                                                                                                                                                                   |
|----|----------|------|---------|-----|----|-------------------------------------------------------------------------------------------------------------------------------------------------------------------|
| 79 | 17200_at | CHR4 | 5124099 | 512 | 6  | At4g09780 F17A8.130 putative protein<br>hypothetical protein F9D12.8 -<br>Arabidopsis thaliana,PID:g3319350                                                       |
| 80 | 17731_at | CHR4 | 5599291 | 194 | 4  | At4g10780 T12H20.8 putative disease<br>resistance protein similar to RPS2,<br>GenBank accession number U14158<br>functional catalog ID=11.05.01                   |
| 81 |          |      | 5599562 | 272 | 8  |                                                                                                                                                                   |
| 82 | 16869_at | CHR4 | 6241576 | 817 | 16 | At4g12180 T4C9.20 putative reverse<br>transcriptase other putative reverse<br>transcriptase -Arabidopsis thaliana                                                 |
| 83 | 20429_at | CHR4 | 7262374 | 200 | 4  | At4g14400 FCAALL.190 hypothetical<br>protein ; supported by cDNA:<br>gi_15810232_gb_AY056155.1_                                                                   |
| 84 | 13356_at | CHR4 | 7292534 | 131 | 7  | At4g14470 FCAALL.217 reverse<br>transcriptase like protein                                                                                                        |
| 85 |          |      | 7292671 | 230 | 5  |                                                                                                                                                                   |
| 86 | 20498_at | CHR4 | 7862991 | 183 | 4  | At4g15570 FCAALL.334 SEN1 like<br>protein                                                                                                                         |
| 87 | 19739_at | CHR4 | 7866999 | 231 | 8  | At4g15590 FCAALL.338 reverse<br>transcriptase like protein<br>At4g18410 F28J12.70 MuDR<br>transposable element - like protein<br>mudrA protein - maize transposon |
| 88 | 16655_at | CHR4 | 9138091 | 148 | 4  | MuDR, PIR2:S59141                                                                                                                                                 |
| 89 | 12561_at | CHR4 | 9425785 | 170 | 7  | At4g19120 T18B16.90 putative protein<br>several hypothetical proteins -<br>Arabidopsis thaliana; supported by<br>cDNA:<br>gi_15320409_dbj_AB039927.1_AB039927     |
| 90 | 19089_at | CHR4 | 9602140 | 155 | 5  | At4g19510 F24J7.70 TMV resistance<br>protein N-like TMV resistance protein<br>N, Nicotiana glutinosa, PIR2:A54810                                                 |



|    |            |      |          |      |    |                                                                                                                                    |
|----|------------|------|----------|------|----|------------------------------------------------------------------------------------------------------------------------------------|
| 91 | 15311_at   | CHR4 | 9799030  | 177  | 6  | At4g19990 F18F4.90 putative protein hypothetical protein, Arabidopsis thaliana, PATCHX:E326848                                     |
| 92 | 12341_s_at | CHR4 | 9842567  | 227  | 5  | At4g20110 F1C12.2 F18F4.210 vacuolar sorting receptor-like protein BP-80 vacuolar sorting receptor, Pisum sativum, PATCHX:G1737222 |
| 93 | 18821_at   | CHR4 | 9879008  | 2096 | 7  | At4g20210 F1C12.130 cadinene synthase like protein (+)-delta-cadinene synthase isozyme XC14, Gossypiumarboreum, PIR2:S68366        |
| 94 | 18597_at   | CHR4 | 10138326 | 159  | 5  | At4g20860 T13K14.20 berberine bridge enzyme - like protein ; supported by cDNA: gi_14194126_gb_AF367269.1_AF367269                 |
| 95 | 20223_at   | CHR4 | 11117491 | 171  | 6  | At4g23250 F21P8.140 protein kinase - like protein receptor kinase 1, Brassica rapa                                                 |
| 96 | 13025_at   | CHR4 | 12041772 | 213  | 6  | At4g25640 L73G19.20 putative protein NorM, Vibrio parahaemolyticus, gb:AB010463                                                    |
| 97 | 15330_at   | CHR4 | 12585516 | 228  | 7  | At4g27190 T24A18.140 putative protein NBS/LRR disease resistance protein - Arabidopsis thaliana, PID:g3309619                      |
| 98 | 14755_at   | CHR4 | 12598659 | 339  | 11 | At4g27220 M4I22.30 putative protein disease resistance protein RPS2, Arabidopsis thaliana, PIR2:A54809                             |
| 99 | 12658_at   | CHR4 | 13021071 | 382  | 7  | At4g28420 F2009.100 tyrosine transaminase-like protein tyrosine transaminase (EC 2.6.1.5)-rat, PIR1:XRNTY                          |

|     |          |      |          |     |    |                                                                                                                                      |
|-----|----------|------|----------|-----|----|--------------------------------------------------------------------------------------------------------------------------------------|
| 100 | 20450_at | CHR5 | 8148310  | 709 | 10 | At5g24150 K12G2.2 MLE8.1 squalene monooxygenase                                                                                      |
| 101 | 19173_at | CHR5 | 9097640  | 567 | 8  | At5g26120 T1N24.13 arabinosidase - like protein arabinosidase asdI, Bacteroides ovatus, EMBL:BO15178                                 |
| 102 | 14876_at | CHR5 | 9106663  | 636 | 9  | At5g26140 T1N24.16 putative protein various predicted lysine decarboxylase proteins, Arabidopsis thaliana                            |
| 103 | 19395_at | CHR5 | 9439456  | 876 | 4  | At5g26940 F2P16.200 putative protein various predicted bacterial DNA polymerase subunits;supported by full-length cDNA: Ceres:32265. |
|     | 13997_at | CHR5 |          |     |    | At5g26950 F2P16.17 putative protein various predicted proteins, Arabidopsis thaliana                                                 |
| 104 | 18516_at | CHR5 | 9492135  | 181 | 7  | At5g27100 T21B4.10 ion channel - like protein ligand gated channel-like protein, Brassica napus, EMBL:AF109392                       |
| 105 | 18585_at | CHR5 | 21251785 | 233 | 6  | At5g53130 MFH8.6 cyclic nucleotide-regulated ion channel (emb CAA76178.1) ; supported by cDNA: gi_13877752_gb_AF370139.1_AF370139    |

## References

- Lipshutz, R.J., S.P. Fodor, T.R. Gingeras, and D.J. Lockhart. 1999. High density synthetic oligonucleotide arrays. *Nat Genet* **21**: 20-24.
- Lockhart, D.J., H. Dong, M.C. Byrne, M.T. Follettie, M.V. Gallo, M.S. Chee, M. Mittmann, C. Wang, M. Kobayashi, H. Horton, and E.L. Brown. 1996. Expression monitoring by hybridization to high-density oligonucleotide arrays. *Nat Biotechnol* **14**: 1675-1680.
